# Supplementary material for: OCT-Derived Radiomic Features Predict Anti–VEGF Response and Durability in Neovascular Age-Related Macular Degeneration
Source: PubMed Central journal article supplement — Ophthalmol Sci. 2022 May 18;2(4):100171. doi: 10.1016/j.xops.2022.100171 (PMC9754979; doi:10.1016/j.xops.2022.100171), 2022-05-18

## Supplemental Appendix I. Distinguishing Treatment Response/Durability Based on Thickness-based Features

To distinguish the treatment response based on thickness-based features ( $F_t$ ), we measured the thickness of individual subcompartments from each of the OCT scans. A total of 7 statistics (mean, median, standard deviation, kurtosis, skewness, maximum and minimum thickness) were derived from the thickness of each individual OCT subcompartment and averaged over the 43 mid-central slices per patient. The top 8 discriminating baseline features were determined by mRmR feature selection method from  $F_t$  and used in conjunction with 4 different ML classifiers (RF, LDA, QDA, and SVM) to predict early response to anti-VEGF. The AUC, ACC, sensitivity, and specificity yielded by the different classifiers on  $F_t$  are presented in **Supplemental Table 5**. The QDA classifier yielded highest AUC of  $0.58\pm 0.12$ , AUC-PRC of  $0.53\pm 0.14$  and ACC of  $0.56\pm 0.14$  in distinguishing the two groups of patients using  $F_t$ .

**Supplemental Table 5: Supervised Classification Results on Baseline Thickness Features**

| Features | Classifier            | AUC                              | AUC-PRC                          | ACC                              | Sensitivity                      | Specificity                      |
|----------|-----------------------|----------------------------------|----------------------------------|----------------------------------|----------------------------------|----------------------------------|
| $F_t$    | RF                    | $0.55\pm 0.14$                   | $0.51\pm 0.14$                   | $0.51\pm 0.14$                   | $0.53\pm 0.21$                   | $0.51\pm 0.11$                   |
|          | LDA                   | $0.56\pm 0.13$                   | $0.52\pm 0.15$                   | $0.52\pm 0.19$                   | $0.54\pm 0.12$                   | $0.55\pm 0.14$                   |
|          | <b>QDA</b>            | <b><math>0.58\pm 0.12</math></b> | <b><math>0.53\pm 0.14</math></b> | <b><math>0.56\pm 0.14</math></b> | <b><math>0.64\pm 0.09</math></b> | <b><math>0.56\pm 0.16</math></b> |
|          | SVM (Linear Kernel)   | $0.57\pm 0.7$                    | $0.53\pm 0.14$                   | $0.53\pm 0.11$                   | $0.61\pm 0.12$                   | $0.53\pm 0.12$                   |
|          | SVM (Gaussian Kernel) | $0.55\pm 0.9$                    | $0.54\pm 0.15$                   | $0.55\pm 0.18$                   | $0.59\pm 0.13$                   | $0.54\pm 0.12$                   |

The most discriminating baseline thickness features which were found to be statistically significant between the two groups of patients were: Mean RPE-BM Thickness (p-value=0.0022), Skewness SHRM Thickness (p-value=2.285e-09) and Kurtosis SHRM Thickness (p-value=2.4586e-09). The box and whisker plots of these 3 baseline thickness features are presented in **Supplemental Figure 2**.

**Supplemental Figure 2.** Box and Whisker plot of Baseline Thickness Features (a) Mean RPE-BM Thickness ( $p=0.0022$ ), (b) Kurtosis SHRM Thickness ( $p=2.4586e-09$ ) and (c) Skewness SHRM Thickness ( $p=4.2842e-09$ ) that significantly distinguished between Super Responders ( $N=15$ ) and Non-super Responders ( $N=66$ ). RPE, retinal pigment epithelium; BM, Bruch's membrane, SHRM, subretinal hyper-reflective material.

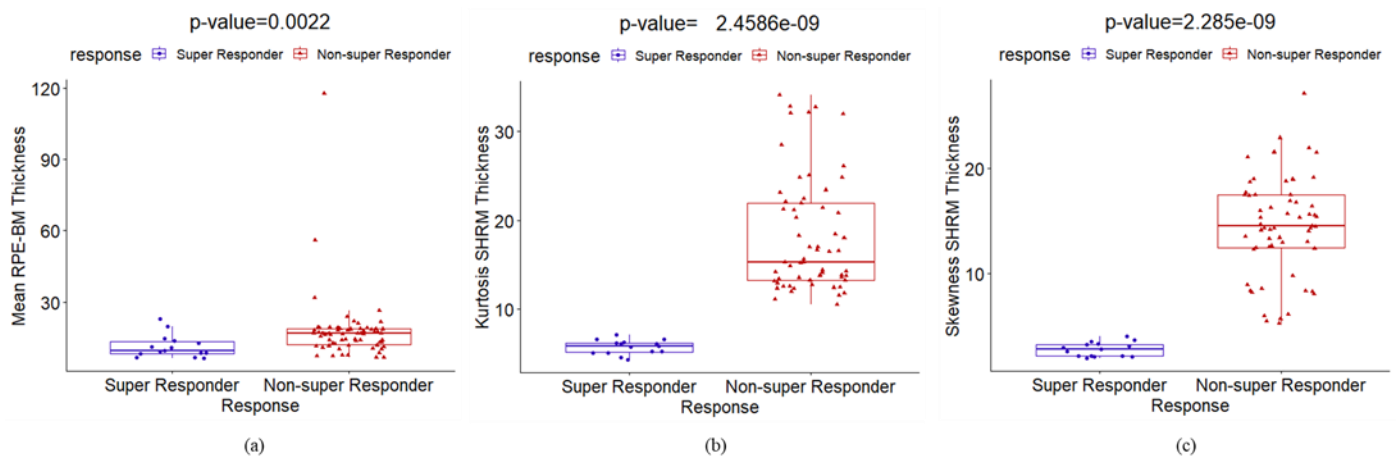

Supplement: mmc5.pdf [file mmc5.pdf]
