# Supplementary material for: OCT-Derived Radiomic Features Predict Anti–VEGF Response and Durability in Neovascular Age-Related Macular Degeneration
Source: PubMed Central journal article supplement — Ophthalmol Sci. 2022 May 18;2(4):100171. doi: 10.1016/j.xops.2022.100171 (PMC9754979; doi:10.1016/j.xops.2022.100171), 2022-05-18
Supplement: mmc1.pdf [file mmc1.pdf]

**Supplemental Table 1. Description of Radiomics Features.** The different radiomic features from the fluid and the retinal tissue compartments are described below.

| Sl. No. | Radiomics Features            | Description                                                                                                                                                                                                                                                                                                                                                                                   |
|---------|-------------------------------|-----------------------------------------------------------------------------------------------------------------------------------------------------------------------------------------------------------------------------------------------------------------------------------------------------------------------------------------------------------------------------------------------|
| 1.      | Haralick (52 Descriptors)     | These features capture variations in gray-level co-occurrence patterns, and provide useful information regarding spatial distribution and the relative position of various gray-level distributions using higher-order statistics. <sup>45</sup>                                                                                                                                              |
| 2.      | Gabor (383 Descriptors)       | Gabor features capture gradients across different wavelengths and orientations. Gabor filters consider oriented textures via changes in direction and scale to capture microarchitectures. <sup>46</sup> Each descriptor quantifies response to a given Gabor filter at a specific frequency ( $f = 0, 2, 4, 8, 16, 32$ ) and orientation ( $\theta = \pi/8, \pi/4, 3\pi/8, \pi/2, 3\pi/4$ ). |
| 3.      | Laws Energy (501 Descriptors) | Laws energy features extract level (L), edge (E), spot (S), wave (W), and ripple (R) patterns on an image using $5 \times 5$ masks that are symmetric or antisymmetric. <sup>47</sup> Convolution of these masks with each image results in a total of 25 distinct Laws features for each image.                                                                                              |
| 4.      | CoLlage (26 Descriptors)      | CoLlage features seek to capture anisotropic tensor gradient differences across similar-appearing pathologies in an image through the computation of the entropy of co-occurrences of pixel/voxel-level gradient orientations computed within a local neighborhood. <sup>19</sup>                                                                                                             |
