# Supplementary material for: OCT-Derived Radiomic Features Predict Anti–VEGF Response and Durability in Neovascular Age-Related Macular Degeneration
Source: PubMed Central journal article supplement — Ophthalmol Sci. 2022 May 18;2(4):100171. doi: 10.1016/j.xops.2022.100171 (PMC9754979; doi:10.1016/j.xops.2022.100171), 2022-05-18
Supplement: mmc2.pdf [file mmc2.pdf]

**Supplemental Table 2. Supervised Classification Results Per Baseline OCT Features.**

| Features   | Classifier            | AUC              | AUC-PRC          | ACC              | Sensitivity      | Specificity      |
|------------|-----------------------|------------------|------------------|------------------|------------------|------------------|
| $F_f$      | RF                    | 0.66±0.18        | 0.62±0.17        | 0.72±0.11        | 0.71±0.1         | 0.66±0.03        |
|            | LDA                   | 0.72±0.11        | 0.70±0.13        | 0.74±0.09        | 0.72±0.08        | 0.59 ±0.07       |
|            | <b>QDA</b>            | <b>0.74±0.08</b> | <b>0.73±0.09</b> | <b>0.77±0.04</b> | <b>0.74±0.07</b> | <b>0.76±0.09</b> |
|            | SVM (Linear kernel)   | 0.65±0.07        | 0.61±0.13        | 0.68±0.12        | 0.7±0.09         | 0.73 ± 0.18      |
|            | SVM (Gaussian kernel) | 0.64±0.1         | 0.62±0.12        | 0.69±0.08        | 0.7±0.07         | 0.74 ± 0.21      |
| $F_{shrm}$ | RF                    | 0.69±0.09        | 0.62±0.18        | 0.68±0.1         | 0.7±0.04         | 0.72 ± 0.14      |
|            | LDA                   | 0.7±0.07         | 0.64±0.16        | 0.7±0.09         | 0.72±0.09        | 0.73 ± 0.10      |
|            | <b>QDA</b>            | <b>0.72±0.04</b> | <b>0.70±0.1</b>  | <b>0.75±0.04</b> | <b>0.74±0.08</b> | <b>0.77±0.09</b> |
|            | SVM (Linear kernel)   | 0.68±0.07        | 0.63±0.11        | 0.68±0.08        | 0.72±0.06        | 0.51 ± 0.05      |
|            | SVM (Gaussian kernel) | 0.67±0.06        | 0.64±0.18        | 0.67±0.1         | 0.71±0.13        | 0.51± .08        |
| $F_{rtc1}$ | RF                    | 0.6±0.12         | 0.66±0.17        | 0.74±0.12        | 0.67±0.07        | 0.58±0.18        |
|            | LDA                   | 0.68±0.11        | 0.73±0.13        | 0.74±0.11        | 0.7±0.11         | 0.68±0.03        |
|            | <b>QDA</b>            | <b>0.7±0.09</b>  | <b>0.68±0.11</b> | <b>0.76±0.09</b> | <b>0.73±0.07</b> | <b>0.73±0.04</b> |
|            | SVM (Linear kernel)   | 0.65±0.08        | 0.64±0.15        | 0.7±0.08         | 0.68±0.18        | 0.68±0.06        |
|            | SVM (Gaussian kernel) | 0.61±0.07        | 0.63±0.11        | 0.68±0.11        | 0.68±0.11        | 0.67±0.05        |
|            | RF                    | 0.68±0.11        | 0.63±0.13        | 0.7±0.09         | 0.71±0.08        | 0.65±0.08        |
|            | LDA                   | 0.69±0.1         | 0.6±0.11         | 0.7±0.08         | 0.71±0.07        | 0.71±0.04        |

|            |                       |                  |                 |                  |                  |                  |
|------------|-----------------------|------------------|-----------------|------------------|------------------|------------------|
| $F_{rtc2}$ | <b>QDA</b>            | <b>0.73±0.09</b> | <b>0.7±0.09</b> | <b>0.75±0.04</b> | <b>0.73±0.07</b> | <b>0.77±0.07</b> |
|            | SVM (Linear kernel)   | 0.66±0.07        | 0.6±0.14        | 0.67±0.08        | 0.69±0.06        | 0.69±0.18        |
|            | SVM (Gaussian kernel) | 0.66±0.13        | 0.62±0.12       | 0.68±0.06        | 0.69±0.09        | 0.7±0.11         |
| $F_{oct}$  | RF                    | 0.71±0.11        | 0.68±0.14       | 0.78±0.13        | 0.74±0.09        | 0.7±0.11         |
|            | LDA                   | 0.72±0.12        | 0.66±0.15       | 0.78±0.1         | 0.75±0.11        | 0.75±0.03        |
|            | <b>QDA</b>            | <b>0.75±0.09</b> | <b>0.73±0.1</b> | <b>0.78±0.04</b> | <b>0.77±0.02</b> | <b>0.80±0.08</b> |
|            | SVM (Linear kernel)   | 0.7±0.06         | 0.68±0.11       | 0.78±0.11        | 0.74±0.02        | 0.72±0.1         |
|            | SVM (Gaussian kernel) | 0.71±0.04        | 0.70±0.13       | 0.78±0.12        | 0.73±0.12        | 0.73±0.03        |

ACC, accuracy; AUC, area under the receiver-operating characteristic curve; AUC-PRC, area under the precision-recall curve; LDA, linear discriminant analysis; QDA, quadratic discriminant analysis; RF, retinal fluid; SVM, support vector machine.
