# Supplementary material for: OCT-Derived Radiomic Features Predict Anti–VEGF Response and Durability in Neovascular Age-Related Macular Degeneration
Source: PubMed Central journal article supplement — Ophthalmol Sci. 2022 May 18;2(4):100171. doi: 10.1016/j.xops.2022.100171 (PMC9754979; doi:10.1016/j.xops.2022.100171), 2022-05-18
Supplement: mmc3.pdf [file mmc3.pdf]

**Supplemental Table 3. Supervised Classification Results Per Delta-Texture OCT Features.**

| Features        | Classifier            | AUC              | AUC-PRC          | ACC              | Sensitivity      | Specificity      |
|-----------------|-----------------------|------------------|------------------|------------------|------------------|------------------|
| $\Delta_{shrm}$ | RF                    | 0.62±0.11        | 0.61±0.15        | 0.72±0.11        | 0.67±0.07        | 0.68± 0.14       |
|                 | LDA                   | 0.73±0.1         | 0.63±0.19        | 0.74±0.03        | 0.7±0.01         | 0.69± 0.09       |
|                 | <b>QDA</b>            | <b>0.76±0.07</b> | <b>0.74±0.08</b> | <b>0.77±0.03</b> | <b>0.78±0.07</b> | <b>0.76±0.05</b> |
|                 | SVM (Linear kernel)   | 0.75±0.03        | 0.7±0.18         | 0.7±0.02         | 0.72±0.06        | 0.65 ± .15       |
|                 | SVM (Gaussian kernel) | 0.74±0.14        | 0.71±0.16        | 0.72±0.11        | 0.71±0.13        | 0.67± .12        |
| $\Delta_{rtc1}$ | RF                    | 0.71±0.07        | 0.69±0.16        | 0.69±0.01        | 0.69±0.04        | 0.63±0.02        |
|                 | LDA                   | 0.73±0.08        | 0.7±0.11         | 0.71±0.1         | 0.7±0.04         | 0.65±0.07        |
|                 | <b>QDA</b>            | <b>0.75±0.08</b> | <b>0.71±0.1</b>  | <b>0.74±0.03</b> | <b>0.76±0.08</b> | <b>0.77±0.02</b> |
|                 | SVM (Linear kernel)   | 0.69±0.08        | 0.63±0.16        | 0.7±0.06         | 0.65±0.1         | 0.72±0.03        |
|                 | SVM (Gaussian kernel) | 0.71±0.07        | 0.68±0.17        | 0.71±0.12        | 0.67±0.12        | 0.73±0.04        |
| $\Delta_{rtc2}$ | RF                    | 0.64±0.19        | 0.62±0.16        | 0.69±0.02        | 0.67±0.04        | 0.67±0.06        |
|                 | LDA                   | 0.67±0.09        | 0.63±0.19        | 0.67±0.03        | 0.69±0.01        | 0.71±0.05        |
|                 | <b>QDA</b>            | <b>0.68±0.06</b> | <b>0.65±0.09</b> | <b>0.72±0.05</b> | <b>0.71±0.08</b> | <b>0.69±0.09</b> |
|                 | SVM (Linear kernel)   | 0.66±0.09        | 0.61±0.12        | 0.69±0.05        | 0.66±0.07        | 0.68±0.13        |
|                 | SVM (Gaussian kernel) | 0.65±0.11        | 0.62±0.12        | 0.68±0.04        | 0.67±0.03        | 0.67±0.13        |
|                 | RF                    | 0.73±0.08        | 0.72±0.11        | 0.73±0.06        | 0.71±0.08        | 0.68±0.01        |
|                 | LDA                   | 0.74±0.09        | 0.72±0.14        | 0.76±0.08        | 0.74±0.15        | 0.75±0.07        |

|                |                       |                  |                 |                  |                  |                  |
|----------------|-----------------------|------------------|-----------------|------------------|------------------|------------------|
| $\Delta_{oct}$ | <b>QDA</b>            | <b>0.78±0.08</b> | <b>0.76±0.1</b> | <b>0.82±0.07</b> | <b>0.81±0.04</b> | <b>0.80±0.07</b> |
|                | SVM (Linear kernel)   | 0.75±0.06        | 0.72±0.13       | 0.76±0.09        | 0.72±0.06        | 0.73±0.09        |
|                | SVM (Gaussian kernel) | 0.75±0.05        | 0.72±0.11       | 0.77±0.06        | 0.71±0.11        | 0.72±0.04        |

ACC, accuracy; AUC, area under the receiver-operating characteristic curve; AUC-PRC, area under the precision-recall curve; LDA, linear discriminant analysis; QDA, quadratic discriminant analysis; RF, retinal fluid; SVM, support vector machine.
