# Supplementary material for: OCT-Derived Radiomic Features Predict Anti–VEGF Response and Durability in Neovascular Age-Related Macular Degeneration
Source: PubMed Central journal article supplement — Ophthalmol Sci. 2022 May 18;2(4):100171. doi: 10.1016/j.xops.2022.100171 (PMC9754979; doi:10.1016/j.xops.2022.100171), 2022-05-18
Supplement: mmc4.pdf [file mmc4.pdf]

**Supplemental Table 4. Supervised Classification Results on Combined Baseline, Delta-Texture, and Clinical Features (*F*) for Individual OCT Subcompartments.**

| Features | Classifier            | AUC              | AUC-PRC          | ACC              | Sensitivity      | Specificity      |
|----------|-----------------------|------------------|------------------|------------------|------------------|------------------|
| <i>F</i> | RF                    | 0.79±0.08        | 0.72±0.11        | 0.71±0.06        | 0.71±0.08        | 0.69±0.01        |
|          | LDA                   | 0.79±0.09        | 0.73±0.14        | 0.71±0.08        | 0.74±0.15        | 0.72±0.07        |
|          | <b>QDA</b>            | <b>0.81±0.07</b> | <b>0.78±0.08</b> | <b>0.72±0.09</b> | <b>0.83±0.07</b> | <b>0.81±0.09</b> |
|          | SVM (Linear Kernel)   | 0.77±0.06        | 0.71±0.13        | 0.71±0.09        | 0.72±0.06        | 0.71±0.09        |
|          | SVM (Gaussian Kernel) | 0.76±0.05        | 0.7±0.11         | 0.71±0.06        | 0.71±0.11        | 0.7±0.04         |

ACC, accuracy; AUC, area under the receiver-operating characteristic curve; AUC-PRC, area under the precision-recall curve; LDA, linear discriminant analysis; QDA, quadratic discriminant analysis; RF, retinal fluid; SVM, support vector machine.
