# Supplementary material for: OCT-Derived Radiomic Features Predict Anti–VEGF Response and Durability in Neovascular Age-Related Macular Degeneration
Source: PubMed Central journal article supplement — Ophthalmol Sci. 2022 May 18;2(4):100171. doi: 10.1016/j.xops.2022.100171 (PMC9754979; doi:10.1016/j.xops.2022.100171), 2022-05-18
Supplement: mmc6.pdf [file mmc6.pdf]

## Supplemental Appendix II. Distinguishing Treatment Response/Durability Based on Delta Thickness Features

Additionally, the alteration of the thickness-based features between baseline and specific treatment visits (delta-thickness,  $\Delta_t$ ) were also evaluated in a similar way. The QDA classifier yielded highest AUC of  $0.59 \pm 0.09$ , AUC-PRC of  $0.51 \pm 0.11$  and ACC of  $0.55 \pm 0.09$  using  $\Delta_t$ . The AUC, ACC, sensitivity, and specificity yielded by the different classifiers on  $F_t$  are presented in **Supplemental Table 6**.

**Supplemental Table 6: Supervised Classification Results on Delta-Thickness Features**

| Features   | Classifier            | AUC                               | AUC-PRC                           | ACC                               | Sensitivity                       | Specificity                       |
|------------|-----------------------|-----------------------------------|-----------------------------------|-----------------------------------|-----------------------------------|-----------------------------------|
| $\Delta_t$ | RF                    | $0.55 \pm 0.16$                   | $0.51 \pm 0.13$                   | $0.58 \pm 0.11$                   | $0.51 \pm 0.04$                   | $0.52 \pm 0.11$                   |
|            | LDA                   | $0.52 \pm 0.11$                   | $0.54 \pm 0.14$                   | $0.57 \pm 0.12$                   | $0.54 \pm 0.09$                   | $0.53 \pm 0.2$                    |
|            | <b>QDA</b>            | <b><math>0.59 \pm 0.09</math></b> | <b><math>0.51 \pm 0.11</math></b> | <b><math>0.55 \pm 0.09</math></b> | <b><math>0.51 \pm 0.08</math></b> | <b><math>0.57 \pm 0.19</math></b> |
|            | SVM (Linear Kernel)   | $0.51 \pm 0.13$                   | $0.50 \pm 0.16$                   | $0.58 \pm 0.1$                    | $0.55 \pm 0.06$                   | $0.56 \pm 0.11$                   |
|            | SVM (Gaussian Kernel) | $0.54 \pm 0.16$                   | $0.51 \pm 0.13$                   | $0.57 \pm 0.14$                   | $0.55 \pm 0.13$                   | $0.52 \pm 0.12$                   |

The most discriminating delta-thickness features which showed statistically significant difference between the Super Responders and Non-super Responders included Mean RPE-BM Thickness (p-value=0.0049) and Median RPE-BM Thickness (p-value=0.0468). The box and whisker plots of these 2 delta-thickness features are presented in **Supplemental Figure 3**.

**Supplemental Figure 3.** Box and Whisker plot of the Delta Thickness Features (a) Mean RPE-BM Thickness ( $p=0.0049$ ), (b) Median RPE-BM Thickness ( $p=0.0468$ ) that significantly distinguished between Super Responders ( $N=15$ ) and Non-super Responders ( $N=66$ ). RPE, Retinal Pigment Epithelium; BM, Bruch's Membrane, SHRM, Subretinal hyper-reflective Material.

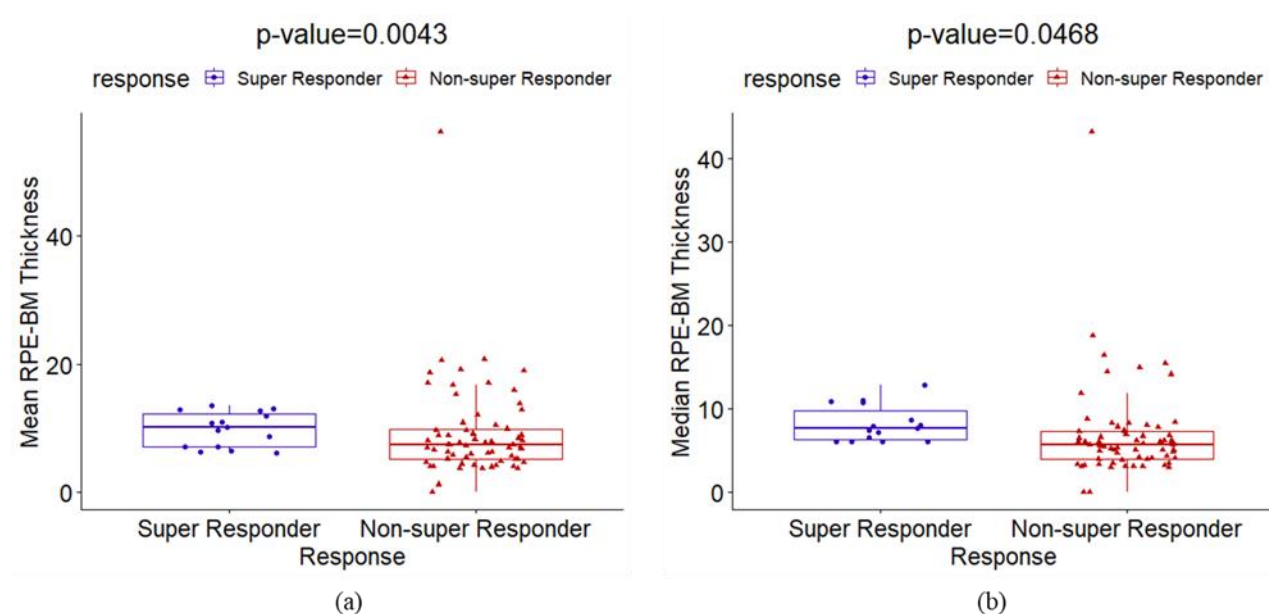

We also evaluated our radiomic model (based on baseline, delta-texture and clinical parameters) in combination with  $F_t$  and  $\Delta_t$  in distinguishing Super Responders from Non-super Responders; however, no significant improvement in the classifier performance was observed.
