# Supplementary material for: OCT-Derived Radiomic Features Predict Anti–VEGF Response and Durability in Neovascular Age-Related Macular Degeneration
Source: PubMed Central journal article supplement — Ophthalmol Sci. 2022 May 18;2(4):100171. doi: 10.1016/j.xops.2022.100171 (PMC9754979; doi:10.1016/j.xops.2022.100171), 2022-05-18
Supplement: mmc8.pdf [file mmc8.pdf]

**Supplemental Figure 1. Clinical Feature Evaluation.** Box and whisker plots of the baseline clinical features: (a) Actual retinal tissue volume, (b) macular RFI, (c) macular SRFI, (d) subretinal fluid volume, (e) SHRM volume, and (f) macular TRFI. Actual retinal tissue volume, macular RFI, macular SRFI, SRF volume, SHRM volume, and macular TRFI did not demonstrate any statistically significant difference between the 2 groups of patients. RFI, retinal fluid index; SHRM, subretinal hyperreflective material; SRFI, subretinal fluid index; TRFI, total retinal fluid index.

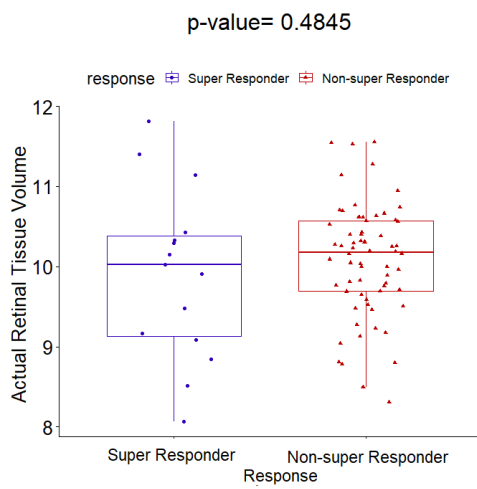

(a)

p-value= 0.37

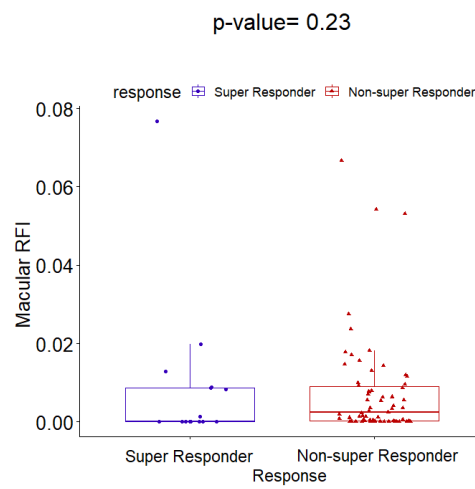

(b)

p-value= 0.37

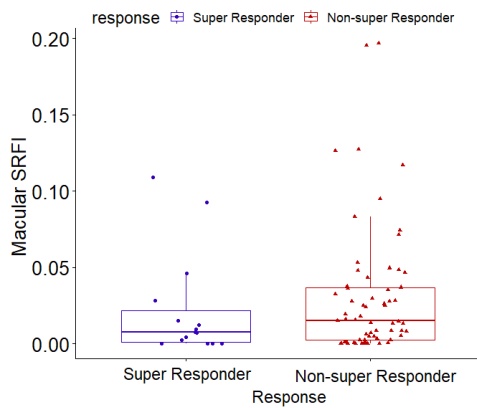

(c)

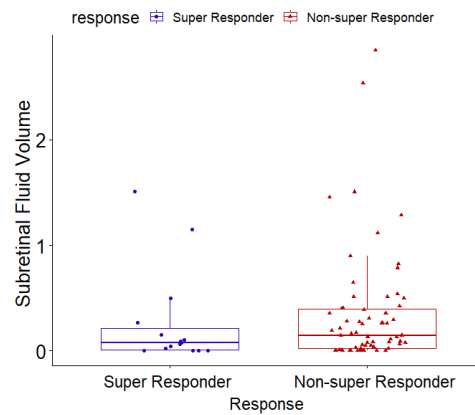

(d)

p-value= 0.7335

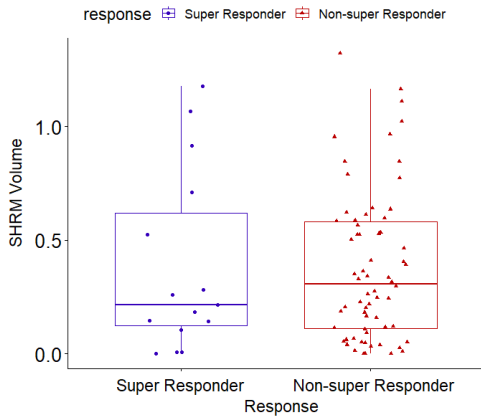

(e)

p-value= 0.14

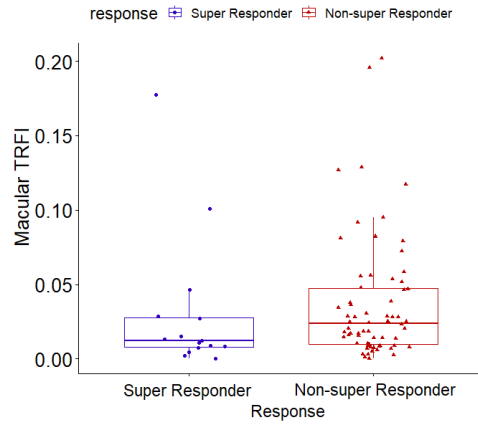

(f)
